# Supplementary material for: Metagenomic Insights Into the Microbial Iron Cycle of Subseafloor Habitats
Source: Front Microbiol. 2021 Sep 3;12:667944. doi: 10.3389/fmicb.2021.667944 (PMC8446621; doi:10.3389/fmicb.2021.667944)
Supplement: Supplementary file 2 [file Table_1.XLSX]

## Sheet: Table S1. FeGenie updates
Table S1. Noteworthy updates to FeGenie's algorithm and HMM library.
Update type	Details	Reference
New HMM	Type 4 electroactive/aromatic pili (t4ap)	Bray et al.,2020
New HMM	G. acetivorans cytochrome (GACE_1843)	Mardanov et al., 2014
New HMM	G. acetivorans cytochrome (GACE_1844)	Mardanov et al., 2014
New HMM	G. acetivorans cytochrome (GACE_1845)	Mardanov et al., 2014
New HMM	G. acetivorans cytochrome (GACE_1846)	Mardanov et al., 2014
New HMM	G. acetivorans cytochrome (GACE_1847)	Mardanov et al., 2014
New HMM	Zrt- and Irt-related protein (ZIP)	Pinilla-Tenas et al., 2011
New HMM	Natural resistance-associated macrophage protein (NRAMP)	Link et al., 2011
New Flag/Option/Output	Output all genes that surpass bit score cutoffs to FeGenie HMMs, regardless of operon structure and gene proximities (--all_results)	NA
New Flag/Option/Output	Identify all genes with heme c and heme b-binding motifs (--heme)	Li et al., 2011
New Flag/Option/Output	Identify all genes with hematite-binding motifs (--hbm)	Lower et al., 2008
New Flag/Option/Output	Skip the time-intensive parts of the algorithm and re-run FeGenie with the previously generated gene-call and hmmsearch results	NA
New Flag/Option/Output	Conda install now includes MetaBAT2, from which FeGenie uses the jgi_summarize_bam_contig_depths script to estimate coverage on contigs (if a BAM file is provided via the -bam flag)	Kang et al., 2019
New Flag/Option/Output	In addition to protein sequences, FeGenie will also output nucleotide gene sequences from the predicted genes, generated using Prodigal	Hyatt et al., 2010
New Flag/Option/Output	Conda recipe created for FeGenie	NA
New Flag/Option/Output	Dockerfile added for FeGenie dependencies	NA
