# Supplementary material for: Metagenomic Insights Into the Microbial Iron Cycle of Subseafloor Habitats
Source: Front Microbiol. 2021 Sep 3;12:667944. doi: 10.3389/fmicb.2021.667944 (PMC8446621; doi:10.3389/fmicb.2021.667944)
Supplement: Supplementary file 7 [file Data_Sheet_1.CSV]

Sample	Site	gene	taxa
Adriatic.fasta	Adriatic Sea	Cyc2_repCluster3	Ignavibacteriae bacterium HGW-Ignavibacteriae-2; bacterium; bacterium;
Adriatic.fasta	Adriatic Sea	OmcS	Calditrichaeota bacterium; Gemmatimonadales bacterium; Krumholzibacteria bacterium;
Adriatic.fasta	Adriatic Sea	OmcZ	Gammaproteobacteria bacterium;
CostaRica_22mbsf.fasta	Costa Rica	Cyc2_repCluster3	Anaerolineae bacterium; Chloroflexi bacterium;
CostaRica_22mbsf.fasta	Costa Rica	OmcS	Desulfobacteraceae bacterium;
CostaRica_2mbsf.fasta	Costa Rica	Cyc2_repCluster3	Chloroflexi bacterium; Proteobacteria bacterium;
CostaRica_2mbsf.fasta	Costa Rica	MtrC_TIGR03507	Anaerolineales bacterium; Chloroflexi bacterium;
LokisCastle_3.3mbsf	Lokis Castle	Cyc2_repCluster3	Acidiferrobacteraceae bacterium; Acidobacteria bacterium; Acidobacteria bacterium; Aliifodinibius sp.; Calditrichaeota bacterium; Calditrichaeota bacterium; Calditrichaeota bacterium; Candidatus Aminicenantes bacterium; Candidatus Glassbacteria bacterium RIFCSPLOWO2_12_FULL_58_11; Candidatus Marinimicrobia bacterium; Chlamydiae bacterium; Desulfobacterales bacterium; Gammaproteobacteria bacterium…
LokisCastle_3.3mbsf	Lokis Castle	DFE_0461	Acidobacteria bacterium; Phycisphaerae bacterium; Verrucomicrobia bacterium; candidate division Zixibacteria bacterium; candidate division Zixibacteria bacterium; candidate division Zixibacteria bacterium;
LokisCastle_3.3mbsf	Lokis Castle	DFE_0462	Phycisphaerae bacterium; Phycisphaerae bacterium;
LokisCastle_3.3mbsf	Lokis Castle	DFE_0463	Verrucomicrobia bacterium;
LokisCastle_3.3mbsf	Lokis Castle	DFE_0464	Phycisphaerae bacterium;
LokisCastle_3.3mbsf	Lokis Castle	DFE_0465	candidate division Zixibacteria bacterium; candidate division Zixibacteria bacterium;
LokisCastle_3.3mbsf	Lokis Castle	DmkA	Clostridiales bacterium;
LokisCastle_3.3mbsf	Lokis Castle	DmkB	Clostridiales bacterium;
LokisCastle_3.3mbsf	Lokis Castle	EetA	Cellulosilyticum sp. I15G10I2;
LokisCastle_3.3mbsf	Lokis Castle	EetB	Clostridiales bacterium;
LokisCastle_3.3mbsf	Lokis Castle	FmnB	Ruminiclostridium sufflavum;
LokisCastle_3.3mbsf	Lokis Castle	MamA	Desulfobacterales bacterium; bacterium; bacterium;
LokisCastle_3.3mbsf	Lokis Castle	MamB	Desulfobacterales bacterium; bacterium; bacterium;
LokisCastle_3.3mbsf	Lokis Castle	MamE	Candidatus Omnitrophica bacterium; Desulfobacterales bacterium; Omnitrophica WOR_2 bacterium GWA2_45_18;
LokisCastle_3.3mbsf	Lokis Castle	MamI	Desulfobacterales bacterium; Desulfobacterales bacterium;
LokisCastle_3.3mbsf	Lokis Castle	MamM	bacterium; bacterium;
LokisCastle_3.3mbsf	Lokis Castle	MamO	Candidatus Helarchaeota archaeon;
LokisCastle_3.3mbsf	Lokis Castle	MamP	Candidatus Omnitrophica bacterium; Candidatus Omnitrophica bacterium; Desulfobacterales bacterium;
LokisCastle_3.3mbsf	Lokis Castle	MamQ	Deltaproteobacteria bacterium; bacterium;
LokisCastle_3.3mbsf	Lokis Castle	MtrC_TIGR03507	Acidobacteria bacterium; Anaerolineae bacterium; Olavius sp. associated proteobacterium Delta 1; Olavius sp. associated proteobacterium Delta 1; Olavius sp. associated proteobacterium Delta 1; Olavius sp. associated proteobacterium Delta 1;
LokisCastle_3.3mbsf	Lokis Castle	Ndh2	Clostridiales bacterium;
LokisCastle_3.3mbsf	Lokis Castle	OmcS	Deltaproteobacteria bacterium; Desulfobacteraceae bacterium; Desulfobacteraceae bacterium; Desulfobacteraceae bacterium; Desulfobacteraceae bacterium; Geoalkalibacter subterraneus; Krumholzibacteria bacterium; Nitrospiraceae bacterium;
LokisCastle_3.3mbsf	Lokis Castle	sulfocyanin	SAR202 cluster bacterium; SAR202 cluster bacterium; SAR202 cluster bacterium;
LokisCastle_11.2mbsf	Lokis Castle	Cyc2_repCluster2	Desulfobacterales bacterium CG23_combo_of_CG06-09_8_20_14_all_52_9; Desulfobacterales bacterium CG23_combo_of_CG06-09_8_20_14_all_52_9; Gemmatimonadetes bacterium 13_1_40CM_4_69_8;
LokisCastle_11.2mbsf	Lokis Castle	Cyc2_repCluster3	Acidiferrobacteraceae bacterium; Acidobacteria bacterium; Acidobacteria bacterium; Acidobacteria bacterium; Acidobacteria bacterium; Armatimonadetes bacterium; Bacteroides sp.; Bacteroides sp.; Bacteroides sp.; Candidatus Aminicenantes bacterium; Candidatus Aminicenantes bacterium; Candidatus Eisenbacteria bacterium; Candidatus Scalindua rubra; Candidatus Scalindua rubra; Candidatus Schekmanbacte…
LokisCastle_11.2mbsf	Lokis Castle	DFE_0461	Actinobacteria bacterium;
LokisCastle_11.2mbsf	Lokis Castle	DFE_0462	Actinobacteria bacterium;
LokisCastle_11.2mbsf	Lokis Castle	DFE_0463	Actinobacteria bacterium;
LokisCastle_11.2mbsf	Lokis Castle	DFE_0464	Actinobacteria bacterium;
LokisCastle_11.2mbsf	Lokis Castle	MtrC_TIGR03507	Acidobacteria bacterium; Acidobacteria bacterium RIFCSPLOWO2_02_FULL_59_13; Anaeromyxobacter sp. PSR-1; Candidatus Omnitrophica bacterium; Candidatus Solibacter sp.; Chloroflexi bacterium; Desulfuromonas sp.; Holophagae bacterium; Olavius sp. associated proteobacterium Delta 1; Olavius sp. associated proteobacterium Delta 1; Pleionea sediminis;
LokisCastle_11.2mbsf	Lokis Castle	OmcS	Desulfobacteraceae bacterium; Krumholzibacteria bacterium; candidate division Zixibacteria bacterium HGW-Zixibacteria-1;
LokisCastle_11.2mbsf	Lokis Castle	OmcZ	Gammaproteobacteria bacterium;
LokisCastle_11.2mbsf	Lokis Castle	t4ap	Desulfococcus sp. 4484_242;
LokisCastle_11.2mbsf	Lokis Castle	Cyc2_repCluster1	Deltaproteobacteria bacterium GWB2_42_7;
LokisCastle_11.2mbsf	Lokis Castle	Cyc2_repCluster3	Acidobacteria bacterium; Acidobacteria bacterium; Acidobacteria bacterium; Acidobacteria bacterium; Acidobacteria bacterium; Acidobacteria bacterium; Aliifodinibius sp.; Aliifodinibius sp.; Bacteroides sp.; Bacteroides sp.; Bacteroides sp.; Bacteroides sp.; Bacteroides sp.; Bacteroidetes bacterium; Bacteroidetes bacterium; Calditrichaeota bacterium; Calditrichaeota bacterium; Candidatus Aminicena…
LokisCastle_11.2mbsf	Lokis Castle	DFE_0448	Desulfobacteraceae bacterium; Desulfobacteraceae bacterium;
LokisCastle_11.2mbsf	Lokis Castle	DFE_0450	Desulfobacteraceae bacterium; Desulfobacteraceae bacterium;
LokisCastle_11.2mbsf	Lokis Castle	DFE_0451	Desulfobacteraceae bacterium; Desulfobacteraceae bacterium;
LokisCastle_11.2mbsf	Lokis Castle	DFE_0461	Anaerolineaceae bacterium; Deltaproteobacteria bacterium; Desulfobacteraceae bacterium; Desulfobacteraceae bacterium;
LokisCastle_11.2mbsf	Lokis Castle	DFE_0462	Actinobacteria bacterium; Deferribacteres bacterium; Desulfobacteraceae bacterium; Desulfobacteraceae bacterium; Desulfobacterales bacterium C00003060; bacterium; bacterium;
LokisCastle_11.2mbsf	Lokis Castle	DFE_0463	Actinobacteria bacterium; Desulfobacteraceae bacterium; Desulfobacteraceae bacterium; Desulfobacterales bacterium C00003060; bacterium;
LokisCastle_11.2mbsf	Lokis Castle	DFE_0464	Candidatus Schekmanbacteria bacterium; Candidatus Schekmanbacteria bacterium;
LokisCastle_11.2mbsf	Lokis Castle	DmkA	Clostridiales bacterium; Nitrospirae bacterium;
LokisCastle_11.2mbsf	Lokis Castle	DmkB	Candidatus Omnitrophica bacterium; Clostridiales bacterium;
LokisCastle_11.2mbsf	Lokis Castle	EetA	Cellulosilyticum sp. I15G10I2; Elusimicrobia bacterium RIFOXYD2_FULL_34_15;
LokisCastle_11.2mbsf	Lokis Castle	EetB	Armatimonadetes bacterium; Clostridiales bacterium;
LokisCastle_11.2mbsf	Lokis Castle	FmnB	Armatimonadetes bacterium; Ruminiclostridium sufflavum;
LokisCastle_11.2mbsf	Lokis Castle	FoxE	Calditrichaeota bacterium;
LokisCastle_11.2mbsf	Lokis Castle	MtrC_TIGR03507	Acidobacteria bacterium; Anaerolineae bacterium; Colwellia sp. BRX10-3; Deltaproteobacteria bacterium HGW-Deltaproteobacteria-20; Desulfuromonas sp.; Holophagae bacterium; Olavius sp. associated proteobacterium Delta 1; Olavius sp. associated proteobacterium Delta 1; Olavius sp. associated proteobacterium Delta 1; Olavius sp. associated proteobacterium Delta 1; Olavius sp. associated proteobacter…
LokisCastle_11.2mbsf	Lokis Castle	Ndh2	Clostridiales bacterium;
LokisCastle_11.2mbsf	Lokis Castle	OmcS	Candidatus Eisenbacteria bacterium; Candidatus Eisenbacteria bacterium; Candidatus Latescibacteria bacterium; Desulfobacteraceae bacterium; Desulfobacteraceae bacterium; candidate division Zixibacteria bacterium HGW-Zixibacteria-1;
LokisCastle_11.2mbsf	Lokis Castle	OmcZ	Desulfobacterales bacterium; Desulfurivibrio sp.; Desulfurivibrio sp.; Desulfuromonas sp.; Gammaproteobacteria bacterium; Gammaproteobacteria bacterium; Gammaproteobacteria bacterium; Gammaproteobacteria bacterium; Gammaproteobacteria bacterium; Gammaproteobacteria bacterium; Gammaproteobacteria bacterium; Gammaproteobacteria bacterium; Gammaproteobacteria bacterium; Gammaproteobacteria bacterium…
LokisCastle_11.2mbsf	Lokis Castle	sulfocyanin	SAR202 cluster bacterium;
LokisCastle_11.2mbsf	Lokis Castle	Cyc1	Ralstonia solanacearum;
LokisCastle_11.2mbsf	Lokis Castle	Cyc2_repCluster2	Gemmatimonadetes bacterium 13_1_40CM_4_69_8; Ralstonia solanacearum; Ralstonia solanacearum; Ralstonia solanacearum;
LokisCastle_11.2mbsf	Lokis Castle	Cyc2_repCluster3	Acidobacteria bacterium; Acidobacteria bacterium; Acidobacteria bacterium; Armatimonadetes bacterium; Bacteroides sp.; Bacteroides sp.; Bacteroides sp.; Bacteroides sp.; Bacteroides sp.; Bacteroidetes bacterium; Bacteroidetes bacterium; Calditrichaeota bacterium; Candidatus Marinimicrobia bacterium; Candidatus Marinimicrobia bacterium; Candidatus Schekmanbacteria bacterium RIFCSPLOWO2_02_FULL_38_…
LokisCastle_11.2mbsf	Lokis Castle	DFE_0461	Candidatus Schekmanbacteria bacterium RBG_16_38_10; Deltaproteobacteria bacterium SG8_13; Desulfurivibrio sp.; Nitrospinae bacterium RIFCSPHIGHO2_02_39_11; Nitrospira bacterium SG8_3; Phycisphaerae bacterium; Phycisphaerae bacterium; Planctomycetes bacterium;
LokisCastle_11.2mbsf	Lokis Castle	DFE_0462	Deltaproteobacteria bacterium; Desulfobacteraceae bacterium; Nitrospinae bacterium RIFCSPHIGHO2_02_39_11; Nitrospirales bacterium; Phycisphaerae bacterium; Phycisphaerae bacterium; Phycisphaerae bacterium; bacterium;
LokisCastle_11.2mbsf	Lokis Castle	DFE_0463	Deltaproteobacteria bacterium; Desulfobacteraceae bacterium; Nitrospinae bacterium RIFCSPLOWO2_12_39_16; Nitrospira bacterium HGW-Nitrospira-1; Nitrospiraceae bacterium;
LokisCastle_11.2mbsf	Lokis Castle	DFE_0464	Betaproteobacteria bacterium RIFCSPLOWO2_12_FULL_67_28; Deltaproteobacteria bacterium; Nitrospinae bacterium RIFCSPLOWO2_12_39_16; Phycisphaerae bacterium;
LokisCastle_11.2mbsf	Lokis Castle	DFE_0465	Deltaproteobacteria bacterium GWA2_43_19; Planctomycetes bacterium B3_Pla;
LokisCastle_11.2mbsf	Lokis Castle	FoxZ	Deltaproteobacteria bacterium;
LokisCastle_11.2mbsf	Lokis Castle	MamA	Candidatus Hydrogenedentes bacterium; Candidatus Scalindua sp.; Nitrospirae bacterium; bacterium; bacterium;
LokisCastle_11.2mbsf	Lokis Castle	MamB	Candidatus Hydrogenedentes bacterium; Nitrospinae bacterium; bacterium; bacterium;
LokisCastle_11.2mbsf	Lokis Castle	MamE	Candidatus Omnitrophica bacterium; Candidatus Omnitrophica bacterium; Chloroflexi bacterium; Nitrospirae bacterium;
LokisCastle_11.2mbsf	Lokis Castle	MamI	Nitrospirae bacterium;
LokisCastle_11.2mbsf	Lokis Castle	MamK	Candidatus Scalindua sp.; Magnetococcales bacterium;
LokisCastle_11.2mbsf	Lokis Castle	MamM	Candidatus Scalindua sp.; Nitrospirae bacterium; bacterium; bacterium;
LokisCastle_11.2mbsf	Lokis Castle	MamO	Candidatus Helarchaeota archaeon; Candidatus Hydrogenedentes bacterium; Candidatus Scalindua sp.; Nitrospirae bacterium;
LokisCastle_11.2mbsf	Lokis Castle	MamP	Candidatus Hydrogenedentes bacterium; Candidatus Omnitrophica bacterium; Candidatus Omnitrophica bacterium; Candidatus Scalindua sp.; Magnetococcales bacterium;
LokisCastle_11.2mbsf	Lokis Castle	MamQ	Nitrospirae bacterium;
LokisCastle_11.2mbsf	Lokis Castle	MtoA	Deltaproteobacteria bacterium GWA2_43_19; Nitrospinae bacterium CG11_big_fil_rev_8_21_14_0_20_45_15;
LokisCastle_11.2mbsf	Lokis Castle	MtrB_TIGR03509	Deltaproteobacteria bacterium GWA2_43_19; Deltaproteobacteria bacterium GWA2_43_19;
LokisCastle_11.2mbsf	Lokis Castle	MtrC_TIGR03507	Acidobacteria bacterium; Candidatus Hydrogenedens sp.; Candidatus Hydrogenedens sp.; Candidatus Hydrogenedentes bacterium; Chloroflexi bacterium; Colwellia sp. BRX10-3; Deltaproteobacteria bacterium HGW-Deltaproteobacteria-20; Desulfobulbaceae bacterium; Gammaproteobacteria bacterium SG8_47; Olavius sp. associated proteobacterium Delta 1; Parahaliea aestuarii;
LokisCastle_11.2mbsf	Lokis Castle	OmcS	Deltaproteobacteria bacterium; Desulfobacteraceae bacterium; Desulfobacteraceae bacterium; Proteobacteria bacterium; candidate division Zixibacteria bacterium HGW-Zixibacteria-1;
LokisCastle_11.2mbsf	Lokis Castle	OmcZ	Gammaproteobacteria bacterium; Gammaproteobacteria bacterium; Gammaproteobacteria bacterium; Gammaproteobacteria bacterium; Gammaproteobacteria bacterium;
LokisCastle_11.2mbsf	Lokis Castle	sulfocyanin	Bacteroidetes bacterium; SAR202 cluster bacterium;
Guaymas_MG_contigs.fasta	Guaymas Basin	Cyc2_repCluster3	Bacteroidetes bacterium; candidate division KSB1 bacterium 4484_87;
Guaymas_MG_contigs.fasta	Guaymas Basin	DFE_0448	Thermodesulfobacteria bacterium; Thermodesulfobacteria bacterium;
Guaymas_MG_contigs.fasta	Guaymas Basin	DFE_0449	Thermodesulfobacteria bacterium; Thermodesulfobacteria bacterium;
Guaymas_MG_contigs.fasta	Guaymas Basin	DFE_0450	Thermodesulfobacteria bacterium;
Guaymas_MG_contigs.fasta	Guaymas Basin	DFE_0451	Thermodesulfobacteria bacterium;
Guaymas_MG_contigs.fasta	Guaymas Basin	DFE_0461	Candidatus Pacearchaeota archaeon; Deltaproteobacteria bacterium; Deltaproteobacteria bacterium; Deltaproteobacteria bacterium; Deltaproteobacteria bacterium; Deltaproteobacteria bacterium; Tenericutes bacterium; Thermodesulfobacteria bacterium;
Guaymas_MG_contigs.fasta	Guaymas Basin	DFE_0462	Aquificae bacterium; Candidatus Pacearchaeota archaeon; Deltaproteobacteria bacterium; Deltaproteobacteria bacterium; Deltaproteobacteria bacterium; Deltaproteobacteria bacterium; Deltaproteobacteria bacterium; Deltaproteobacteria bacterium; Deltaproteobacteria bacterium; Tenericutes bacterium; Thermodesulfobacteria bacterium;
Guaymas_MG_contigs.fasta	Guaymas Basin	DFE_0463	Aquificae bacterium; Deltaproteobacteria bacterium; Deltaproteobacteria bacterium; Deltaproteobacteria bacterium; Deltaproteobacteria bacterium; Deltaproteobacteria bacterium; Tenericutes bacterium; Thermodesulfobacteria bacterium;
Guaymas_MG_contigs.fasta	Guaymas Basin	DFE_0464	Aquificae bacterium; Candidatus Pacearchaeota archaeon;
Guaymas_MG_contigs.fasta	Guaymas Basin	DFE_0465	Deltaproteobacteria bacterium;
Guaymas_MG_contigs.fasta	Guaymas Basin	MtoA	Gammaproteobacteria bacterium; Gammaproteobacteria bacterium; Gammaproteobacteria bacterium; Gammaproteobacteria bacterium;
Guaymas_MG_contigs.fasta	Guaymas Basin	MtrA	Gammaproteobacteria bacterium; Gammaproteobacteria bacterium; Gammaproteobacteria bacterium; Gammaproteobacteria bacterium;
Guaymas_MG_contigs.fasta	Guaymas Basin	MtrB_TIGR03509	Gammaproteobacteria bacterium; Gammaproteobacteria bacterium; Gammaproteobacteria bacterium; Gammaproteobacteria bacterium; Gammaproteobacteria bacterium; Gammaproteobacteria bacterium; Gammaproteobacteria bacterium;
Guaymas_MG_contigs.fasta	Guaymas Basin	MtrC_TIGR03507	Gammaproteobacteria bacterium; Gammaproteobacteria bacterium; Gammaproteobacteria bacterium; Gammaproteobacteria bacterium; Gammaproteobacteria bacterium;
Guaymas_MG_contigs.fasta	Guaymas Basin	OmcS	Deltaproteobacteria bacterium; Deltaproteobacteria bacterium; bacterium; bacterium; bacterium;
Guaymas_MG_contigs.fasta	Guaymas Basin	OmcZ	Methanosarcinales archaeon;
Guaymas_MG_contigs.fasta	Guaymas Basin	t4ap	Deltaproteobacteria bacterium; Deltaproteobacteria bacterium;
JdF-biofilm.fasta	JdF Biofilm	Cyc1	Pelomonas saccharophila;
JdF-biofilm.fasta	JdF Biofilm	Cyc2_repCluster2	Pelomonas saccharophila; Pelomonas saccharophila; Ralstonia solanacearum; Ralstonia solanacearum; Ralstonia solanacearum;
JdF-biofilm.fasta	JdF Biofilm	Cyc2_repCluster3	Acidobacteria bacterium; Clostridiales bacterium PH28_bin88;
JdF-biofilm.fasta	JdF Biofilm	GACE_1843	Geoglobus acetivorans;
JdF-biofilm.fasta	JdF Biofilm	GACE_1844	Geoglobus acetivorans; Geoglobus acetivorans; Geoglobus acetivorans;
JdF-biofilm.fasta	JdF Biofilm	GACE_1845	Geoglobus acetivorans;
JdF-biofilm.fasta	JdF Biofilm	GACE_1846	Ferroglobus placidus; Geoglobus acetivorans;
JdF-biofilm.fasta	JdF Biofilm	MtrA	Thalassotalea sp. 42_200_T64;
JdF-biofilm.fasta	JdF Biofilm	MtrC_TIGR03507	Thalassotalea sp. 42_200_T64;
JdF-biofilm.fasta	JdF Biofilm	OmcS	Geoalkalibacter subterraneus; Malonomonas rubra; Malonomonas rubra; Malonomonas rubra;
JdF-biofilm.fasta	JdF Biofilm	t4ap	Malonomonas rubra;
JdF1362A.fasta	JdF	Cyc2_repCluster3	Calditrichaeota bacterium; Calditrichaeota bacterium; Ignavibacteriales bacterium CG_4_9_14_3_um_filter_30_11; Persephonella marina; bacterium;
JdF1362A.fasta	JdF	DFE_0461	Actinobacteria bacterium; Actinobacteria bacterium; Actinobacteria bacterium; Actinobacteria bacterium HGW-Actinobacteria-1; Actinobacteria bacterium HGW-Actinobacteria-1; Actinobacteria bacterium HGW-Actinobacteria-1; Bacteroidetes bacterium GWA2_30_7; Nitrospirae bacterium; Nitrospirae bacterium; Nitrospirae bacterium; candidate division WOR-3 bacterium;
JdF1362A.fasta	JdF	DFE_0462	Actinobacteria bacterium HGW-Actinobacteria-1; Deferribacter autotrophicus; Nitrospiraceae bacterium; Nitrospirae bacterium; Nitrospirae bacterium; Sulfurimonas sp. RIFCSPLOWO2_12_36_12; Thermoanaerobaculum aquaticum; Verrucomicrobia bacterium; Verrucomicrobia bacterium; bacterium HR11;
JdF1362A.fasta	JdF	DFE_0463	Actinobacteria bacterium; Actinobacteria bacterium HGW-Actinobacteria-1; Hydrogenimonas sp.; Thermincola ferriacetica; Thermincola ferriacetica; Thermincola ferriacetica;
JdF1362A.fasta	JdF	DFE_0464	Nitrospirae bacterium; Nitrospirae bacterium; Nitrospirae bacterium;
JdF1362A.fasta	JdF	DFE_0465	Deferribacteres bacterium; Geobacteraceae bacterium; Nitrospirae bacterium; Nitrospirae bacterium;
JdF1362A.fasta	JdF	DmkA	Thermohalobacter berrensis;
JdF1362A.fasta	JdF	DmkB	Firmicutes bacterium;
JdF1362A.fasta	JdF	FmnB	Firmicutes bacterium;
JdF1362A.fasta	JdF	GACE_1845	Euryarchaeota archaeon;
JdF1362A.fasta	JdF	GACE_1846	Candidatus Methanoperedenaceae archaeon HGW-Methanoperedenaceae-1; Euryarchaeota archaeon;
JdF1362A.fasta	JdF	GACE_1847	Candidatus Methanoperedens sp.;
JdF1362A.fasta	JdF	MtoA	Proteobacteria bacterium;
JdF1362A.fasta	JdF	MtrB_TIGR03509	Candidatus Manganitrophus noduliformans;
JdF1362A.fasta	JdF	Ndh2	Firmicutes bacterium;
JdF1362A.fasta	JdF	OmcZ	Sedimenticola sp.;
JdF1362A.fasta	JdF	PplA	Firmicutes bacterium;
JdF1362A.fasta	JdF	t4ap	Nitrospirae bacterium;
JdF1362B.fasta	JdF	Cyc1	Cupriavidus basilensis;
JdF1362B.fasta	JdF	Cyc2_repCluster2	Cupriavidus basilensis; Cupriavidus sp. UME77; Pelomonas puraquae; Porticoccaceae bacterium; Rhizomicrobium electricum;
JdF1362B.fasta	JdF	Cyc2_repCluster3	Calditrichaeota bacterium; Euryarchaeota archaeon;
JdF1362B.fasta	JdF	GACE_1845	Candidatus Woesearchaeota archaeon; Euryarchaeota archaeon;
JdF1362B.fasta	JdF	GACE_1846	Candidatus Methanoperedenaceae archaeon HGW-Methanoperedenaceae-1; Euryarchaeota archaeon; Euryarchaeota archaeon; Euryarchaeota archaeon;
JdF1362B.fasta	JdF	GACE_1847	Candidatus Methanoperedens sp.; Euryarchaeota archaeon;
Solent.fasta	Solent	Cyc2_repCluster1	Candidatus Muproteobacteria bacterium RIFCSPLOWO2_01_FULL_60_18; Candidatus Muproteobacteria bacterium RIFCSPLOWO2_01_FULL_60_18; Gammaproteobacteria bacterium; Gammaproteobacteria bacterium; Sulfurimonas sp. RIFCSPLOWO2_02_FULL_36_28; Sulfurovum sp. ST-419; Sulfurovum sp. ST-419;
Solent.fasta	Solent	Cyc2_repCluster3	Gammaproteobacteria bacterium; Gammaproteobacteria bacterium; Gammaproteobacteria bacterium; Thioalkalivibrio sp. XN8; Thioploca sp.;
Solent.fasta	Solent	FoxE	Alphaproteobacteria bacterium; Anaerolineae bacterium; Rhodospirillaceae bacterium;
Solent.fasta	Solent	MtoA	Proteobacteria bacterium;
Solent.fasta	Solent	MtrA	Chromatiales bacterium;
Solent.fasta	Solent	MtrB_TIGR03509	Gammaproteobacteria bacterium;
Solent.fasta	Solent	MtrC_TIGR03507	Chromatiales bacterium; Desulfobulbaceae bacterium; Gammaproteobacteria bacterium;
Solent.fasta	Solent	OmcS	Desulfobacteraceae bacterium; Desulfuromonadales bacterium;
South_Pacific_Gyre.fasta	South Pacific Gyre	Cyc2_repCluster2	Acidobacteria bacterium;
South_Pacific_Gyre.fasta	South Pacific Gyre	Cyc2_repCluster3	Acidobacteria bacterium; Acidobacteria bacterium; Acidobacteria bacterium; Acidobacteria bacterium; Acidobacteria bacterium RIFCSPLOWO2_12_FULL_54_10; Acidobacteria bacterium RIFCSPLOWO2_12_FULL_54_10; Caldithrix sp.; Calditrichaeota bacterium; Calditrichaeota bacterium; Calditrichaeota bacterium; Candidatus Aminicenantes bacterium; Chthoniobacterales bacterium; Deltaproteobacteria bacterium CG11…
South_Pacific_Gyre.fasta	South Pacific Gyre	sulfocyanin	Gemmatimonadetes bacterium;
U1382A.2012.PRIMARY.CONTIGS.fasta	North Pond	Cyc2_repCluster3	Arcobacter sp.; Chromatiales bacterium; Ectothiorhodospiraceae bacterium; Mariprofundus micogutta;
U1382A.2012.PRIMARY.CONTIGS.fasta	North Pond	MtrA	Moraxellaceae bacterium;
U1382A.2012.PRIMARY.CONTIGS.fasta	North Pond	MtrB_TIGR03509	Moraxellaceae bacterium;
U1382A.2014.PRIMARY.CONTIGS.fasta	North Pond	Cyc2_repCluster3	Candidatus Tenderia electrophaga; Chromatiales bacterium; Ectothiorhodospiraceae bacterium;
U1382A.TP1.PRIMARY.CONTIGS.fasta	North Pond	Cyc2_repCluster1	Zetaproteobacteria bacterium;
U1382A.TP1.PRIMARY.CONTIGS.fasta	North Pond	Cyc2_repCluster2	Mangrovitalea sediminis;
U1382A.TP1.PRIMARY.CONTIGS.fasta	North Pond	MtrA	Shewanella sp.; Shewanella sp.;
U1382A.TP1.PRIMARY.CONTIGS.fasta	North Pond	MtrB_TIGR03509	Shewanella sp.; Shewanella sp.;
U1382A.TP1.PRIMARY.CONTIGS.fasta	North Pond	MtrC_TIGR03507	Shewanella benthica; Shewanella benthica; Shewanella benthica; Shewanella benthica; Shewanella benthica; Shewanella sp.; Shewanella sp.; Shewanella sp.;
U1382A.TP2.PRIMARY.CONTIGS.fasta	North Pond	Cyc2_repCluster1	Mariprofundaceae bacterium;
U1382A.TP2.PRIMARY.CONTIGS.fasta	North Pond	Cyc2_repCluster3	Ectothiorhodospiraceae bacterium; Gammaproteobacteria bacterium; Mariprofundus micogutta; Mariprofundus micogutta; Thiogranum longum;
U1382A.TP3.PRIMARY.CONTIGS.fasta	North Pond	Cyc2_repCluster1	Zetaproteobacteria bacterium;
U1382A.TP3.PRIMARY.CONTIGS.fasta	North Pond	Cyc2_repCluster2	Mangrovitalea sediminis; Mangrovitalea sediminis; Mangrovitalea sediminis; Robiginitomaculum sp.; Robiginitomaculum sp.;
U1382A.TP3.PRIMARY.CONTIGS.fasta	North Pond	Cyc2_repCluster3	Alphaproteobacteria bacterium; Mariprofundus micogutta;
U1382A.TP3.PRIMARY.CONTIGS.fasta	North Pond	MtrA	Gammaproteobacteria bacterium; Shewanella benthica; Shewanella sp.; Shewanella sp.;
U1382A.TP3.PRIMARY.CONTIGS.fasta	North Pond	MtrB_TIGR03509	Gammaproteobacteria bacterium; Shewanella benthica; Shewanella sp.; Shewanella sp.;
U1382A.TP3.PRIMARY.CONTIGS.fasta	North Pond	MtrC_TIGR03507	Shewanella benthica; Shewanella benthica; Shewanella benthica; Shewanella benthica; Shewanella sp.; Shewanella sp.; Shewanella sp.;
U1382A.TP4.PRIMARY.CONTIGS.fasta	North Pond	Cyc2_repCluster3	Gammaproteobacteria bacterium;
U1382A.TP4.PRIMARY.CONTIGS.fasta	North Pond	MtrA	Shewanella benthica; Shewanella sp.; Shewanella sp.;
U1382A.TP4.PRIMARY.CONTIGS.fasta	North Pond	MtrB_TIGR03509	Shewanella benthica; Shewanella sp.; Shewanella sp.;
U1382A.TP4.PRIMARY.CONTIGS.fasta	North Pond	MtrC_TIGR03507	Shewanella benthica; Shewanella benthica; Shewanella sp.; Shewanella sp.; Shewanella sp.;
U1382A.TP5.PRIMARY.CONTIGS.fasta	North Pond	Cyc2_repCluster2	Mangrovitalea sediminis; Mangrovitalea sediminis; Robiginitomaculum sp.; Robiginitomaculum sp.; Robiginitomaculum sp.;
U1382A.TP5.PRIMARY.CONTIGS.fasta	North Pond	Cyc2_repCluster3	Alphaproteobacteria bacterium; Ectothiorhodospiraceae bacterium;
U1382A.TP5.PRIMARY.CONTIGS.fasta	North Pond	MtrA	Gammaproteobacteria bacterium; Shewanella benthica; Shewanella sp.; Shewanella sp.;
U1382A.TP5.PRIMARY.CONTIGS.fasta	North Pond	MtrB_TIGR03509	Gammaproteobacteria bacterium; Shewanella benthica; Shewanella sp.; Shewanella sp.;
U1382A.TP5.PRIMARY.CONTIGS.fasta	North Pond	MtrC_TIGR03507	Shewanella benthica; Shewanella benthica; Shewanella benthica; Shewanella sp.; Shewanella sp.;
U1382A.TP6.PRIMARY.CONTIGS.fasta	North Pond	MtrA	Pseudohongiella sp.;
U1382A.TP6.PRIMARY.CONTIGS.fasta	North Pond	MtrB_TIGR03509	Pseudohongiella sp.;
U1382A.TP7.PRIMARY.CONTIGS.fasta	North Pond	Cyc2_repCluster1	Ghiorsea bivora; Zetaproteobacteria bacterium; Zetaproteobacteria bacterium CG23_combo_of_CG06-09_8_20_14_all_54_7;
U1382A.TP7.PRIMARY.CONTIGS.fasta	North Pond	Cyc2_repCluster3	Candidatus Marinimicrobia bacterium; Candidatus Tenderia electrophaga; Chromatiales bacterium; Ectothiorhodospiraceae bacterium; Mariprofundus micogutta; Thiogranum longum; Vibrio sp. 654;
U1382A.TP8.PRIMARY.CONTIGS.fasta	North Pond	Cyc2_repCluster1	Mariprofundus sp. EBB-1; Mariprofundus sp. EBB-1; Zetaproteobacteria bacterium;
U1382A.TP8.PRIMARY.CONTIGS.fasta	North Pond	Cyc2_repCluster3	Chromatiales bacterium; Ectothiorhodospiraceae bacterium; Mariprofundus ferrooxydans PV-1; Mariprofundus micogutta; Mariprofundus micogutta; Thiogranum longum;
U1383CDEEP.2012.PRIMARY.CONTIGS.fasta	North Pond	Cyc2_repCluster1	Zetaproteobacteria bacterium; Zetaproteobacteria bacterium;
U1383CDEEP.2014.PRIMARY.CONTIGS.fasta	North Pond	Cyc2_repCluster1	Mariprofundaceae bacterium; Mariprofundus aestuarium; Mariprofundus sp. EBB-1; Proteobacteria bacterium; Zetaproteobacteria bacterium; Zetaproteobacteria bacterium; Zetaproteobacteria bacterium;
U1383CDEEP.2014.PRIMARY.CONTIGS.fasta	North Pond	Cyc2_repCluster2	Chlorobi bacterium;
U1383CDEEP.2014.PRIMARY.CONTIGS.fasta	North Pond	Cyc2_repCluster3	Calditrichaeota bacterium; Chromatiales bacterium; Deltaproteobacteria bacterium; Ectothiorhodospiraceae bacterium; Mariprofundus ferrooxydans PV-1; Mariprofundus micogutta; Mariprofundus micogutta; Mariprofundus micogutta; Mariprofundus micogutta; Mariprofundus micogutta; Nitrospira sp.; Zetaproteobacteria bacterium CG1_02_55_237; candidate division Zixibacteria bacterium RBG_16_53_22;
U1383CDEEP.2014.PRIMARY.CONTIGS.fasta	North Pond	DFE_0461	Planctomycetes bacterium;
U1383CDEEP.2014.PRIMARY.CONTIGS.fasta	North Pond	DFE_0462	Phycisphaerales bacterium;
U1383CDEEP.2014.PRIMARY.CONTIGS.fasta	North Pond	DFE_0465	Planctomycetes bacterium;
U1383CDEEP.2014.PRIMARY.CONTIGS.fasta	North Pond	FoxE	Alphaproteobacteria bacterium; Rhodospirillaceae bacterium; Rhodospirillaceae bacterium;
U1383CDEEP.2014.PRIMARY.CONTIGS.fasta	North Pond	MtrA	Gammaproteobacteria bacterium;
U1383CDEEP.2014.PRIMARY.CONTIGS.fasta	North Pond	MtrB_TIGR03509	Moraxellaceae bacterium;
U1383CDEEP.TP4.PRIMARY.CONTIGS.fasta	North Pond	Cyc2_repCluster1	Ghiorsea bivora; Mariprofundaceae bacterium; Mariprofundus sp. EBB-1; Mariprofundus sp. EBB-1; Proteobacteria bacterium; Zetaproteobacteria bacterium; Zetaproteobacteria bacterium; Zetaproteobacteria bacterium;
U1383CDEEP.TP4.PRIMARY.CONTIGS.fasta	North Pond	Cyc2_repCluster2	Mangrovitalea sediminis; Mangrovitalea sediminis;
U1383CDEEP.TP4.PRIMARY.CONTIGS.fasta	North Pond	Cyc2_repCluster3	Acidobacteria bacterium; Calditrichaeota bacterium; Mariprofundus ferrooxydans PV-1; Mariprofundus ferrooxydans PV-1; Mariprofundus micogutta; Mariprofundus micogutta; Mariprofundus micogutta; Mariprofundus micogutta; Nitrospinae bacterium RIFCSPLOWO2_01_FULL_39_10; Proteobacteria bacterium; Pseudohongiella sp.; Thiotrichaceae bacterium;
U1383CDEEP.TP4.PRIMARY.CONTIGS.fasta	North Pond	DFE_0461	Planctomycetes bacterium;
U1383CDEEP.TP4.PRIMARY.CONTIGS.fasta	North Pond	DFE_0462	Phycisphaeraceae bacterium; Phycisphaerales bacterium;
U1383CDEEP.TP4.PRIMARY.CONTIGS.fasta	North Pond	DFE_0465	Planctomycetes bacterium;
U1383CDEEP.TP4.PRIMARY.CONTIGS.fasta	North Pond	FoxE	Alphaproteobacteria bacterium; Magnetospira sp. QH-2; Rhodospirillaceae bacterium; Rhodospirillaceae bacterium; Rhodospirillaceae bacterium; Rhodospirillaceae bacterium; Rhodospirillales bacterium RIFCSPLOWO2_12_FULL_58_28;
U1383CDEEP.TP4.PRIMARY.CONTIGS.fasta	North Pond	MtrC_TIGR03507	Shewanella benthica; Shewanella benthica; Shewanella sp.;
U1383CSHALLOW.2012.PRIMARY.CONTIGS.fasta	North Pond	Cyc2_repCluster1	Zetaproteobacteria bacterium; Zetaproteobacteria bacterium;
U1383CSHALLOW.2012.PRIMARY.CONTIGS.fasta	North Pond	Cyc2_repCluster2	Cupriavidus basilensis; Cupriavidus sp. UME77;
U1383CSHALLOW.2012.PRIMARY.CONTIGS.fasta	North Pond	Cyc2_repCluster3	Mariprofundus micogutta; Thiotrichaceae bacterium;
U1383CSHALLOW.2012.PRIMARY.CONTIGS.fasta	North Pond	MtrA	Gammaproteobacteria bacterium;
U1383CSHALLOW.2012.PRIMARY.CONTIGS.fasta	North Pond	MtrB_TIGR03509	Gammaproteobacteria bacterium;
U1383CSHALLOW.2014.PRIMARY.CONTIGS.fasta	North Pond	Cyc2_repCluster2	Alphaproteobacteria bacterium; Alphaproteobacteria bacterium;
U1383CSHALLOW.2014.PRIMARY.CONTIGS.fasta	North Pond	Cyc2_repCluster3	Ectothiorhodospiraceae bacterium; Gammaproteobacteria bacterium;
U1383CSHALLOW.TP4.PRIMARY.CONTIGS.fasta	North Pond	Cyc2_repCluster2	Mangrovitalea sediminis;
U1383CSHALLOW.TP4.PRIMARY.CONTIGS.fasta	North Pond	Cyc2_repCluster3	Gammaproteobacteria bacterium;
U1383CSHALLOW.TP4.PRIMARY.CONTIGS.fasta	North Pond	MtrA	Shewanella benthica; Shewanella sp.; Shewanella sp.;
U1383CSHALLOW.TP4.PRIMARY.CONTIGS.fasta	North Pond	MtrB_TIGR03509	Shewanella benthica; Shewanella sp.; Shewanella sp.;
U1383CSHALLOW.TP4.PRIMARY.CONTIGS.fasta	North Pond	MtrC_TIGR03507	Shewanella benthica; Shewanella benthica; Shewanella benthica; Shewanella benthica; Shewanella sp.;
U1383CSHALLOW.TP5.PRIMARY.CONTIGS.fasta	North Pond	Cyc2_repCluster1	Mariprofundaceae bacterium; Zetaproteobacteria bacterium;
U1383CSHALLOW.TP5.PRIMARY.CONTIGS.fasta	North Pond	Cyc2_repCluster3	Mariprofundus micogutta;
U1383CSHALLOW.TP5.PRIMARY.CONTIGS.fasta	North Pond	FoxE	Alphaproteobacteria bacterium; Betaproteobacteria bacterium;
U1383CSHALLOW.TP5.PRIMARY.CONTIGS.fasta	North Pond	MtrA	Gammaproteobacteria bacterium; Shewanella benthica;
U1383CSHALLOW.TP5.PRIMARY.CONTIGS.fasta	North Pond	MtrB_TIGR03509	Gammaproteobacteria bacterium; Shewanella benthica;
U1383CSHALLOW.TP5.PRIMARY.CONTIGS.fasta	North Pond	MtrC_TIGR03507	Shewanella benthica; Shewanella sp.;
eastern_gulf_mexico_0.2mbsf.fasta	Eastern Gulf of Mexico	Cyc2_repCluster2	Aliidongia dinghuensis; Bradyrhizobium erythrophlei; Bradyrhizobium sp. CCBAU 53340;
eastern_gulf_mexico_0.2mbsf.fasta	Eastern Gulf of Mexico	Cyc2_repCluster3	Chthoniobacterales bacterium; Proteobacteria bacterium;
haakon_mosby_0.1mbsf.fasta	Haakon Mosby Mud Volcano	Cyc2_repCluster3	Epsilonproteobacteria bacterium;
santa_monica_mounds_0.3mbsf.fasta	Santa Monica Mounds	Cyc2_repCluster1	Gammaproteobacteria bacterium; Gammaproteobacteria bacterium;
santa_monica_mounds_0.3mbsf.fasta	Santa Monica Mounds	Cyc2_repCluster2	Chloroflexi bacterium;
santa_monica_mounds_0.3mbsf.fasta	Santa Monica Mounds	Cyc2_repCluster3	Acidobacteria bacterium; Candidatus Eisenbacteria bacterium; Candidatus Eisenbacteria bacterium; Gammaproteobacteria bacterium; Nitrospina sp. SCGC_AAA799_A02; candidate division KSB1 bacterium; candidate division KSB1 bacterium;
santa_monica_mounds_0.3mbsf.fasta	Santa Monica Mounds	OmcS	Calditrichaeota bacterium; Deltaproteobacteria bacterium; Desulfobulbaceae bacterium; Desulfuromonas sp.; bacterium CG17_big_fil_post_rev_8_21_14_2_50_64_8;
santa_monica_mounds_0.3mbsf.fasta	Santa Monica Mounds	OmcZ	ANME-2 cluster archaeon; ANME-2 cluster archaeon; ANME-2 cluster archaeon; ANME-2 cluster archaeon; ANME-2 cluster archaeon; ANME-2 cluster archaeon; ANME-2 cluster archaeon; ANME-2 cluster archaeon; ANME-2 cluster archaeon; ANME-2 cluster archaeon; ANME-2 cluster archaeon; ANME-2 cluster archaeon; ANME-2 cluster archaeon; ANME-2 cluster archaeon; ANME-2 cluster archaeon; ANME-2 cluster archaeon;…
santa_monica_mounds_0.3mbsf.fasta	Santa Monica Mounds	sulfocyanin	Caldilineae bacterium;
santa_monica_mounds_0.3mbsf.fasta	Santa Monica Mounds	t4ap	Deltaproteobacteria bacterium; delta proteobacterium ML8_D;
western_gulf_mexico_0.03mbsf.fasta	Western Gulf of Mexico	Cyc2_repCluster2	Chloroflexi bacterium;
western_gulf_mexico_0.03mbsf.fasta	Western Gulf of Mexico	Cyc2_repCluster3	Aquificae bacterium; Krumholzibacteria bacterium;
western_gulf_mexico_0.03mbsf.fasta	Western Gulf of Mexico	DFE_0448	Desulfuromonas acetoxidans DSM 684;
western_gulf_mexico_0.03mbsf.fasta	Western Gulf of Mexico	DFE_0449	Desulfuromonadales bacterium C00003068;
western_gulf_mexico_0.03mbsf.fasta	Western Gulf of Mexico	DFE_0451	Desulfuromonas sp.;
western_gulf_mexico_0.03mbsf.fasta	Western Gulf of Mexico	DFE_0461	Deltaproteobacteria bacterium; Deltaproteobacteria bacterium; Desulfuromonadales bacterium C00003096;
western_gulf_mexico_0.03mbsf.fasta	Western Gulf of Mexico	DFE_0462	Deltaproteobacteria bacterium; Deltaproteobacteria bacterium; Deltaproteobacteria bacterium; Desulfobacterales bacterium PC51MH44;
western_gulf_mexico_0.03mbsf.fasta	Western Gulf of Mexico	DFE_0463	Deltaproteobacteria bacterium; Deltaproteobacteria bacterium; Desulfuromonadales bacterium C00003093; Desulfuromonadales bacterium C00003096;
western_gulf_mexico_0.03mbsf.fasta	Western Gulf of Mexico	DFE_0465	Deltaproteobacteria bacterium;
western_gulf_mexico_0.03mbsf.fasta	Western Gulf of Mexico	MtrC_TIGR03507	Gammaproteobacteria bacterium;
western_gulf_mexico_0.03mbsf.fasta	Western Gulf of Mexico	OmcS	Calditrichaeota bacterium; Desulfurivibrio sp.; bacterium CG17_big_fil_post_rev_8_21_14_2_50_64_8; bacterium CG_4_9_14_3_um_filter_65_15; candidate division Zixibacteria bacterium; candidate division Zixibacteria bacterium HGW-Zixibacteria-1;
western_gulf_mexico_0.03mbsf.fasta	Western Gulf of Mexico	OmcZ	ANME-2 cluster archaeon; ANME-2 cluster archaeon; Desulfobacterales bacterium; Desulfurivibrio sp.; Desulfurivibrio sp.; Desulfurivibrio sp.; Ectothiorhodospiraceae bacterium; Ectothiorhodospiraceae bacterium; Gammaproteobacteria bacterium; Methanophagales archaeon; Methanophagales archaeon; Methanosarcinales archaeon; Methanosarcinales archaeon; Methanosarcinales archaeon; Methanosarcinales arch…
western_gulf_mexico_0.03mbsf.fasta	Western Gulf of Mexico	t4ap	Desulfamplus sp.; Desulfobacter latus; Desulfobacter latus; Desulfobacter latus; Desulfobacter latus; Desulfobacterales bacterium; Desulfuromonas sp.; Pelobacter seleniigenes; Thermococcus sp.; delta proteobacterium ML8_D; delta proteobacterium ML8_D; delta proteobacterium ML8_D; delta proteobacterium ML8_D; delta proteobacterium ML8_D; delta proteobacterium ML8_D;
